# Supplementary material for: Effect of acupuncture on cognitive task performance of college students: a pilot study
Source: publisher site journal article supplement (doi:10.1515/jcim-2020-0026), 2020-12-24
Supplement: Supplementary file 1 [file j_jcim-2020-0026_suppl_002.pdf]

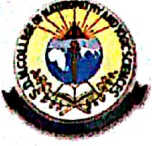

ESTD: 1989

II OM SRI MANJUNATHAYA NAMAHA II

# SRI DHARMASTHALA MANJUNATHESHWARA COLLEGE OF NATUROPATHY AND YOGIC SCIENCES

Affiliated to Rajiv Gandhi University of Health Sciences and Recognized by Govt. of Karnataka

Managed by: S. D. M. Educational Society (Regd.) Ujire.

President: DR. D. VEERENDRA HEGGADE

CENTRE OF EXCELLENCE FOR CLINICAL RESEARCH CENTRE IN NATUROPATHY & YOGIC SCIENCES BY MINISTRY OF AYUSH, GOI

Dr. PRASHANTH SHETTY  
PRINCIPAL

Ref: SDMCNYS/

## INSTITUTIONAL ETHICAL COMMITTEE

### ETHICAL CLEARANCE REGISTRATION CERTIFICATE

This is to certify that the Institutional Ethical Committee has cleared the following Research Projects proposals on 27-08-2017 vide Registration Number noted against-

| Registration Number | Title of the Study                                                        |
|---------------------|---------------------------------------------------------------------------|
| EC-240              | "Effect of Acupuncture on cognitive task performance of college students" |

Date: 27-08-2017

ON BEHALF OF ETHICAL COMMITTEE

  
(Dr. Prashanth Shetty)  
MEMBER SECRETARY  
Principal

Sri D. M. College of Naturopathy  
& Yogic Sciences  
PO. UJIRE - 574 240, (D. Kannada)
